# Supplementary material for: Modelling immune cytotoxicity for cholangiocarcinoma with tumour-derived organoids and effector T cells
Source: PubMed Central journal article supplement (PMC9381772; doi:10.1038/s41416-022-01839-x), 2022-05-21

## Monique Verstegen

---

**From:** Monique Verstegen  
**Sent:** Tuesday, April 19, 2022 5:48 PM  
**To:** Guoying Zhou; Ruby Lieshout; Gilles van Tienderen; valeska@glycostem.com; Martin van Royen; Kübra Koten; y.y.kan@amsterdamumc.nl; 'Cecile Geuijen <C.Geuijen@merus.nl> (C.Geuijen@merus.nl)' (C.Geuijen@merus.nl); Dave Sprengers; Luc van der Laan; Monique Verstegen; luciacampos3190@gmail.com; gezhouhong37@hotmail.com  
**Cc:** Maikel Peppelenbosch; magreluc; Patrick Boor; Jyaysi Desai  
**Subject:** Important! Please respond asap / acceptance manuscript BJC

**Importance:** High

**Follow Up Flag:** Follow up  
**Flag Status:** Flagged

Dear co-authors,

We are nearly there! Manuscript: BJC-A3339175R1 Modelling immune cytotoxicity for cholangiocarcinoma with tumor-derived organoids and effector T cells., gave us a small hiccup that is fortunately easily addressed.

As we needed to do more experiments in absence of Ruby and Estella, we asked Luc (M), Patrick and Jyaysi if they could help us. And they did! So, all were included as co-authors on this manuscript. The Journal now would like to formally ask all of you if you agree to those changes. For this I would need an e-mail from you, in which you confirm that you agree.

**Can you please send me your reply to this e-mail, including a statement that you agree to the changes made, i.e. including Luc Magre, Patrick P.C. Boor and Jyaysi Desai, in the author list at you soonest** so I can bundle all replies and upload them to BJC.

The BJC also wanted me to contact you to ask you to link your own ORCID to this manuscript. You can do this via the author portal here: <https://mts-bjcancer.nature.com/cgi-bin/main.plex> and click on the 'Modify My Springer Nature Account' (see below)

### General Tasks

[Modify My Springer Nature Account](#) *Click here to view your submitted manuscripts, article download*  
[Logout](#)

Hope to see your reply soon,

With kind regards,  
Monique Verstegen  
Corresponding author Manuscript: BJC-A3339175R1

**Dr. M.M.A (Monique) Verstegen Ph.D**

Assistant professor

Surgery

☎ +31 10 703 5528 |

📍 Dr. Molewaterplein 40, 3015 GD Rotterdam

 [m.verstegen@erasmusmc.nl](mailto:m.verstegen@erasmusmc.nl)

 [www.erasmusmc.nl](http://www.erasmusmc.nl)

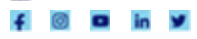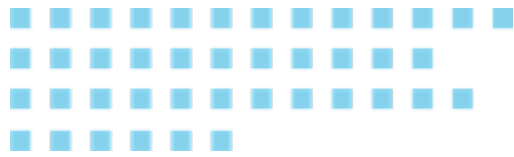

P.O. Box 2040, 3000 CA Rotterdam

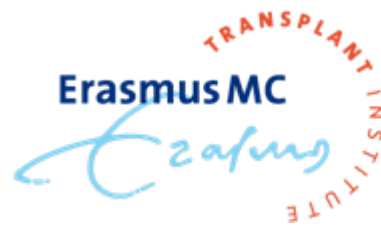

## Monique Verstegen

---

**From:** Cecile Geuijen <C.Geuijen@merus.nl>  
**Sent:** Tuesday, April 19, 2022 9:42 PM  
**To:** Monique Verstegen  
**Subject:** RE: Important! Please respond asap / acceptance manuscript BJC

**Follow Up Flag:** Flag for follow up  
**Flag Status:** Flagged

**Waarschuwing:** Deze e-mail is afkomstig van buiten de organisatie. Klik niet op links en open geen bijlagen, tenzij u de afzender herkent en weet dat de inhoud veilig is.  
**Caution:** This email originated from outside of the organization. Do not click links or open attachments unless you recognize the sender and know the content is safe.

Hi Monique,

Herewith I agree to the changes made, and to include Luc Magre, Patrick P.C. Boor and Jyaysi Desai to the author list for providing the latest data.

Met vriendelijke groet / kind regards,

**Cecile Geuijen**  
Chief Scientific Officer

T +31 85 016 2558  
M +31 6 15 54 23 83  
E C.Geuijen@merus.nl

**Merus** closing in on cancer

---

**From:** Monique Verstegen <m.verstegen@erasmusmc.nl>  
**Sent:** Tuesday, April 19, 2022 5:48 PM  
**To:** Guoying Zhou <g.zhou@erasmusmc.nl>, Ruby Lieshout <r.lieshout@erasmusmc.nl>, Gilles van Tienderen <g.vantienderen@erasmusmc.nl>, valeska@glycostem.com <valeska@glycostem.com>, Martin van Royen <m.vanroyen@erasmusmc.nl>; Kübra Kotten  
**Cc:** m.peppelenbosch <m.peppelenbosch@erasmusmc.nl>; magreluc <magreluc@gmail.com>; Patrick Boor <p.boor@erasmusmc.nl>; J.B. Desai <j.desai@erasmusmc.nl>  
**Subject:** Important! Please respond asap / acceptance manuscript BJC

\*\*\*External Mail\*\*\*

Dear co-authors,

We are nearly there! Manuscript: BJC-A3339175R1 Modelling immune cytotoxicity for cholangiocarcinoma with tumor-derived organoids and effector T cells., gave us a small hiccup that is fortunately easily addressed.

As we needed to do more experiments in absence of Ruby and Estella, we asked Luc (M), Patrick and Jyaysi if they could help us. And they did! So, all were included as co-authors on this manuscript. The Journal now would like to formally ask all of you if you agree to those changes. For this I would need an e-mail from you, in which you confirm that you agree.

**Can you please send me your reply to this e-mail, including a statement that you agree to the changes made, i.e. including Luc Magre, Patrick P.C. Boor and Jyaysi Desai, in the author list at you soonest** so I can bundle all replies and upload them to BJC.

The BJC also wanted me to contact you to ask you to link your own ORCID to this manuscript. You can do this via the author portal here: [nature.com](https://www.nature.com) and click on the 'Modify My Springer Nature Account' (see below)

### General Tasks

[Modify My Springer Nature Account](#) *Click here to view your submitted manuscripts, article download*  
[Logout](#)

Hope to see your reply soon,

With kind regards,  
Monique Verstegen  
Corresponding author Manuscript: BJC-A3339175R1

### Dr. M.M.A (Monique) Verstegen Ph.D

Assistant professor

Surgery

+31 10 703 5528 |  
[m.verstegen@erasmusmc.nl](mailto:m.verstegen@erasmusmc.nl)  
[www.erasmusmc.nl](http://www.erasmusmc.nl)

Dr. Molewaterplein 40, 3015 GD Rotterdam  
P.O. Box 2040, 3000 CA Rotterdam

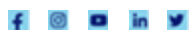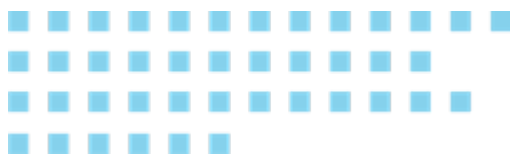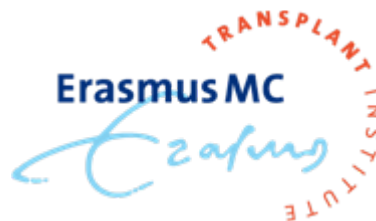

## Monique Verstegen

---

**From:** Dave Sprengers  
**Sent:** Tuesday, April 19, 2022 6:28 PM  
**To:** Monique Verstegen  
**Subject:** RE: Important! Please respond asap / acceptance manuscript BJC

**Follow Up Flag:** Flag for follow up  
**Flag Status:** Flagged

Dear Monique,

I agree to the changes made, i.e. including Luc Magre, Patrick P.C. Boor and Jyaysi Desai, in the author list.

Regards,

Dave Sprengers

MDL-arts  
Erasmus MC

---

**Van:** Monique Verstegen <m.verstegen@erasmusmc.nl>

**Verzonden:** dinsdag 19 april 2022 17:48

**Aan:** Guoying Zhou <g.zhou@erasmusmc.nl>; Ruby Lieshout <r.lieshout@erasmusmc.nl>; Gilles van Tienderen <g.vantienderen@erasmusmc.nl>; valeska@glycostem.com; Martin van Royen <m.vanroyen@erasmusmc.nl>; Kübra Koten <k.koten@erasmusmc.nl>; y.y.kan@amsterdamumc.nl; 'Cecile Geuijen <C.Geuijen@merus.nl> (C.Geuijen@merus.nl)' (C.Geuijen@merus.nl) <C.Geuijen@merus.nl>; Dave Sprengers <d.sprengers@erasmusmc.nl>; Luc van der Laan <l.vanderlaan@erasmusmc.nl>; Monique Verstegen <m.verstegen@erasmusmc.nl>; luciacampos3190@gmail.com; gezhouhong37@hotmail.com

**CC:** Maikel Peppelenbosch <m.peppelenbosch@erasmusmc.nl>; magreluc <magreluc@gmail.com>; Patrick Boor <p.boor@erasmusmc.nl>; Jyaysi Desai <j.desai@erasmusmc.nl>

**Onderwerp:** Important! Please respond asap / acceptance manuscript BJC

**Urgentie:** Hoog

Dear co-authors,

We are nearly there! Manuscript: BJC-A3339175R1 Modelling immune cytotoxicity for cholangiocarcinoma with tumor-derived organoids and effector T cells., gave us a small hiccup that is fortunately easily addressed.

As we needed to do more experiments in absence of Ruby and Estella, we asked Luc (M), Patrick and Jyaysi if they could help us. And they did! So, all were included as co-authors on this manuscript. The Journal now would like to formally ask all of you if you agree to those changes. For this I would need an e-mail from you, in which you confirm that you agree.

**Can you please send me your reply to this e-mail, including a statement that you agree to the changes made, i.e. including Luc Magre, Patrick P.C. Boor and Jyaysi Desai, in the author list at you soonest** so I can bundle all replies and upload them to BJC.

The BJC also wanted me to contact you to ask you to link your own ORCID to this manuscript. You can do this via the author portal here: <https://mts-bjcancer.nature.com/cgi-bin/main.plex> and click on the 'Modify My Springer Nature Account' (see below)

## General Tasks

[Modify My Springer Nature Account](#) *Click here to view your submitted manuscripts, article download*  
[Logout](#)

Hope to see your reply soon,

With kind regards,  
Monique Verstegen  
Corresponding author Manuscript: BJC-A3339175R1

### Dr. M.M.A (Monique) Verstegen Ph.D

Assistant professor

Surgery

☎ +31 10 703 5528 |  
✉ [m.verstegen@erasmusmc.nl](mailto:m.verstegen@erasmusmc.nl)  
🌐 [www.erasmusmc.nl](http://www.erasmusmc.nl)

📍 Dr. Molewaterplein 40, 3015 GD Rotterdam  
P.O. Box 2040, 3000 CA Rotterdam

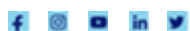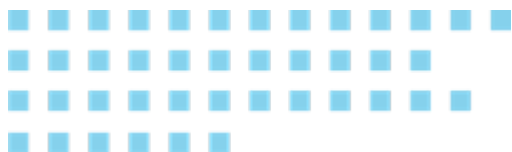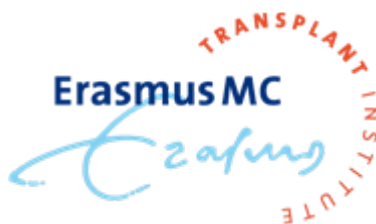

## Monique Verstegen

---

**From:** Gilles van Tienderen  
**Sent:** Wednesday, April 20, 2022 11:55 AM  
**To:** Monique Verstegen  
**Subject:** Re: Important! Please respond asap / acceptance manuscript BJC

Dear Monique,

I agree to the changes made in the manuscript BJC-A3339175R1

Kind regards,

Gilles van Tienderen

---

**From:** Monique Verstegen <m.verstegen@erasmusmc.nl>  
**Sent:** Tuesday, April 19, 2022 4:48:12 PM  
**To:** Guoying Zhou <g.zhou@erasmusmc.nl>; Ruby Lieshout <r.lieshout@erasmusmc.nl>; Gilles van Tienderen <g.vantienderen@erasmusmc.nl>; valeska@glycostem.com <valeska@glycostem.com>; Martin van Royen <m.vanroyen@erasmusmc.nl>; Kübra Koten <k.koten@erasmusmc.nl>; y.y.kan@amsterdamumc.nl <y.y.kan@amsterdamumc.nl>; 'Cecile Geuijen <C.Geuijen@merus.nl> (C.Geuijen@merus.nl)' (C.Geuijen@merus.nl) <C.Geuijen@merus.nl>; Dave Sprengers <d.sprengers@erasmusmc.nl>; Luc van der Laan <l.vanderlaan@erasmusmc.nl>; Monique Verstegen <m.verstegen@erasmusmc.nl>; luciacampos3190@gmail.com <luciacampos3190@gmail.com>; gezhouhong37@hotmail.com <gezhouhong37@hotmail.com>  
**Cc:** Maikel Peppelenbosch <m.peppelenbosch@erasmusmc.nl>; magreluc <magreluc@gmail.com>; Patrick Boor <p.boor@erasmusmc.nl>; Jyaysi Desai <j.desai@erasmusmc.nl>  
**Subject:** Important! Please respond asap / acceptance manuscript BJC

Dear co-authors,

We are nearly there! Manuscript: BJC-A3339175R1 Modelling immune cytotoxicity for cholangiocarcinoma with tumor-derived organoids and effector T cells., gave us a small hick up that is fortunately easily addressed.

As we needed to do more experiments in absence of Ruby and Estella, we asked Luc (M), Patrick and Jyaysi if they could help us. And they did! So, all were included as co-authors on this manuscript. The Journal now would like to formally ask all of you if you agree to those changes. For this I would need an e-mail from you, in which you confirm that you agree.

**Can you please send me your reply to this e-mail, including a statement that you agree to the changes made, i.e. including Luc Magre, Patrick P.C. Boor and Jyaysi Desai, in the author list at you soonest** so I can bundle all replies and upload them to BJC.

The BJC also wanted me to contact you to ask you to link your own ORCID to this manuscript. You can do this via the author portal here: <https://mts-bjcancer.nature.com/cgi-bin/main.plex> and click on the 'Modify My Springer Nature Account' (see below)

### General Tasks

[Modify My Springer Nature Account](#) *Click here to view your submitted manuscripts, article download*  
[Logout](#)

Hope to see your reply soon,

With kind regards,

Monique Verstegen

Corresponding author Manuscript: BJC-A3339175R1

**Dr. M.M.A (Monique) Verstegen Ph.D**

Assistant professor

Surgery

+31 10 703 5528 |  
m.verstegen@erasmusmc.nl  
www.erasmusmc.nl

Dr. Molewaterplein 40, 3015 GD Rotterdam  
P.O. Box 2040, 3000 CA Rotterdam

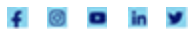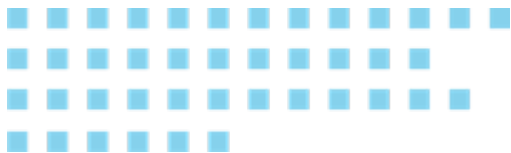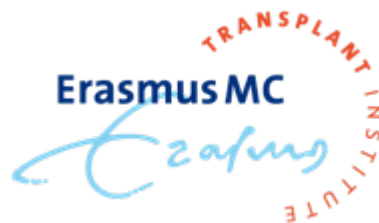



## Monique Verstegen

---

**From:** Guoying Zhou  
**Sent:** Wednesday, April 20, 2022 8:38 AM  
**To:** Monique Verstegen  
**Subject:** Re: Important! Please respond asap / acceptance manuscript BJC

**Follow Up Flag:** Follow up  
**Flag Status:** Completed

I agree to the changes made, i.e. including Luc Magre, Patrick P.C. Boor and Jyaysi Desai, in the author list.  
Best regards,  
Guoying Zhou

---

**From:** Monique Verstegen <m.verstegen@erasmusmc.nl>  
**Sent:** Tuesday, April 19, 2022 11:48:12 PM  
**To:** Guoying Zhou <g.zhou@erasmusmc.nl>; Ruby Lieshout <r.lieshout@erasmusmc.nl>; Gilles van Tienderen <g.vantienderen@erasmusmc.nl>; valeska@glycostem.com <valeska@glycostem.com>; Martin van Royen <m.vanroyen@erasmusmc.nl>; Kübra Koten <k.koten@erasmusmc.nl>; y.y.kan@amsterdamumc.nl <y.y.kan@amsterdamumc.nl>; 'Cecile Geuijen <C.Geuijen@merus.nl> (C.Geuijen@merus.nl)' (C.Geuijen@merus.nl) <C.Geuijen@merus.nl>; Dave Sprengers <d.sprengers@erasmusmc.nl>; Luc van der Laan <l.vanderlaan@erasmusmc.nl>; Monique Verstegen <m.verstegen@erasmusmc.nl>; luciacampos3190@gmail.com <luciacampos3190@gmail.com>; gezhouhong37@hotmail.com <gezhouhong37@hotmail.com>  
**Cc:** Maikel Peppelenbosch <m.peppelenbosch@erasmusmc.nl>; magreluc <magreluc@gmail.com>; Patrick Boor <p.boor@erasmusmc.nl>; Jyaysi Desai <j.desai@erasmusmc.nl>  
**Subject:** Important! Please respond asap / acceptance manuscript BJC

Dear co-authors,

We are nearly there! Manuscript: BJC-A3339175R1 Modelling immune cytotoxicity for cholangiocarcinoma with tumor-derived organoids and effector T cells., gave us a small hick up that is fortunately easily addressed.

As we needed to do more experiments in absence of Ruby and Estella, we asked Luc (M), Patrick and Jyaysi if they could help us. And they did! So, all were included as co-authors on this manuscript. The Journal now would like to formally ask all of you if you agree to those changes. For this I would need an e-mail from you, in which you confirm that you agree.

**Can you please send me your reply to this e-mail, including a statement that you agree to the changes made, i.e. including Luc Magre, Patrick P.C. Boor and Jyaysi Desai, in the author list at you soonest** so I can bundle all replies and upload them to BJC.

The BJC also wanted me to contact you to ask you to link your own ORCID to this manuscript. You can do this via the author portal here: <https://mts-bjcancer.nature.com/cgi-bin/main.plex> and click on the 'Modify My Springer Nature Account' (see below)

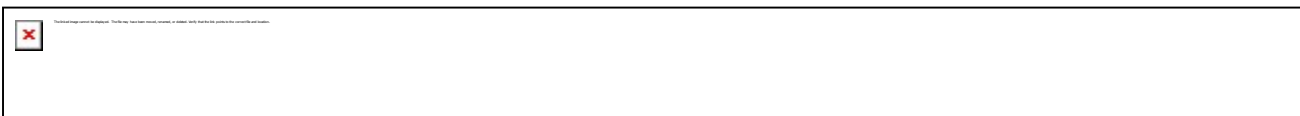

Hope to see your reply soon,

With kind regards,  
Monique Verstegen

**Dr. M.M.A (Monique) Verstegen Ph.D**

Assistant professor

Surgery

- ☐ +31 10 703 5528 |
- ☐ m.verstegen@erasmusmc.nl
- ☐ www.erasmusmc.nl

- ☐ Dr. Molewaterplein 40, 3015 GD Rotterdam
- ☐ P.O. Box 2040, 3000 CA Rotterdam

☐ ☐ ☐ ☐ ☐

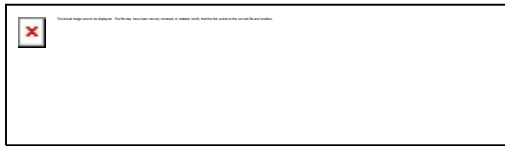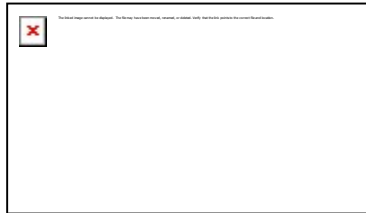

## Monique Verstegen

---

**From:** Jyaysi Desai  
**Sent:** Wednesday, April 20, 2022 10:22 AM  
**To:** Monique Verstegen; Guoying Zhou; Ruby Lieshout; Gilles van Tienderen; valeska@glycostem.com; Martin van Royen; Kübra Koten; y.y.kan@amsterdamumc.nl; 'Cecile Geuijen <C.Geuijen@merus.nl> (C.Geuijen@merus.nl)' (C.Geuijen@merus.nl); Dave Sprengers; Luc van der Laan; luciacampos3190@gmail.com; gezhouhong37@hotmail.com  
**Cc:** Maikel Peppelenbosch; magreluc; Patrick Boor  
**Subject:** RE: Important! Please respond asap / acceptance manuscript BJC

Dear all,

I agree to the changes made in the manuscript BJC-A3339175R1.

Kind regards,  
Jyaysi

---

**From:** Monique Verstegen <m.verstegen@erasmusmc.nl>  
**Sent:** Tuesday, April 19, 2022 5:48 PM  
**To:** Guoying Zhou <g.zhou@erasmusmc.nl>; Ruby Lieshout <r.lieshout@erasmusmc.nl>; Gilles van Tienderen <g.vantienderen@erasmusmc.nl>; valeska@glycostem.com; Martin van Royen <m.vanroyen@erasmusmc.nl>; Kübra Koten <k.koten@erasmusmc.nl>; y.y.kan@amsterdamumc.nl; 'Cecile Geuijen <C.Geuijen@merus.nl> (C.Geuijen@merus.nl)' (C.Geuijen@merus.nl) <C.Geuijen@merus.nl>; Dave Sprengers <d.sprengers@erasmusmc.nl>; Luc van der Laan <l.vanderlaan@erasmusmc.nl>; Monique Verstegen <m.verstegen@erasmusmc.nl>; luciacampos3190@gmail.com; gezhouhong37@hotmail.com  
**Cc:** Maikel Peppelenbosch <m.peppelenbosch@erasmusmc.nl>; magreluc <magreluc@gmail.com>; Patrick Boor <p.boor@erasmusmc.nl>; Jyaysi Desai <j.desai@erasmusmc.nl>  
**Subject:** Important! Please respond asap / acceptance manuscript BJC  
**Importance:** High

Dear co-authors,

We are nearly there! Manuscript: BJC-A3339175R1 Modelling immune cytotoxicity for cholangiocarcinoma with tumor-derived organoids and effector T cells., gave us a small hiccup that is fortunately easily addressed.

As we needed to do more experiments in absence of Ruby and Estella, we asked Luc (M), Patrick and Jyaysi if they could help us. And they did! So, all were included as co-authors on this manuscript. The Journal now would like to formally ask all of you if you agree to those changes. For this I would need an e-mail from you, in which you confirm that you agree.

**Can you please send me your reply to this e-mail, including a statement that you agree to the changes made, i.e. including Luc Magre, Patrick P.C. Boor and Jyaysi Desai, in the author list at you soonest** so I can bundle all replies and upload them to BJC.

The BJC also wanted me to contact you to ask you to link your own ORCID to this manuscript. You can do this via the author portal here: <https://mts-bjcancer.nature.com/cgi-bin/main.plex> and click on the 'Modify My Springer Nature Account' (see below)

## General Tasks

[Modify My Springer Nature Account](#) *Click here to view your submitted manuscripts, article download*  
[Logout](#)

Hope to see your reply soon,

With kind regards,  
Monique Verstegen  
Corresponding author Manuscript: BJC-A3339175R1

### Dr. M.M.A (Monique) Verstegen Ph.D

Assistant professor

Surgery

+31 10 703 5528 |  
[m.verstegen@erasmusmc.nl](mailto:m.verstegen@erasmusmc.nl)  
[www.erasmusmc.nl](http://www.erasmusmc.nl)

Dr. Molewaterplein 40, 3015 GD Rotterdam  
P.O. Box 2040, 3000 CA Rotterdam

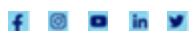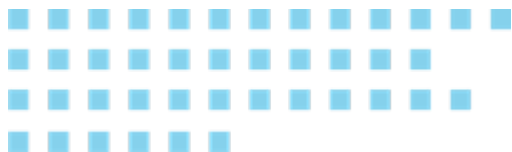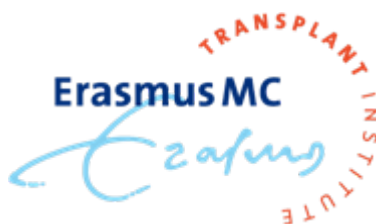

## Monique Verstegen

---

**From:** Kübra Kötten  
**Sent:** Wednesday, April 20, 2022 10:45 AM  
**To:** Jyaysi Desai; Monique Verstegen; Guoying Zhou; Ruby Lieshout; Gilles van Tienderen; valeska@glycostem.com; Martin van Royen; y.y.kan@amsterdamumc.nl; 'Cecile Geuijen <C.Geuijen@merus.nl> (C.Geuijen@merus.nl)' (C.Geuijen@merus.nl); Dave Sprengers; Luc van der Laan; luciacampos3190@gmail.com; gezhouhong37@hotmail.com  
**Cc:** Maikel Peppelenbosch; magreluc; Patrick Boor  
**Subject:** RE: Important! Please respond asap / acceptance manuscript BJC

Dear all,

I agree to the changes made in the manuscript BJC-A3339175R1.

Kind regards,

Kübra Kötten

---

**From:** Jyaysi Desai <j.desai@erasmusmc.nl>  
**Sent:** Wednesday, April 20, 2022 10:22  
**To:** Monique Verstegen <m.verstegen@erasmusmc.nl>; Guoying Zhou <g.zhou@erasmusmc.nl>; Ruby Lieshout <r.lieshout@erasmusmc.nl>; Gilles van Tienderen <g.vantienderen@erasmusmc.nl>; valeska@glycostem.com; Martin van Royen <m.vanroyen@erasmusmc.nl>; Kübra Kötten <k.kotten@erasmusmc.nl>; y.y.kan@amsterdamumc.nl; 'Cecile Geuijen <C.Geuijen@merus.nl> (C.Geuijen@merus.nl)' (C.Geuijen@merus.nl) <C.Geuijen@merus.nl>; Dave Sprengers <d.sprengers@erasmusmc.nl>; Luc van der Laan <l.vanderlaan@erasmusmc.nl>; luciacampos3190@gmail.com; gezhouhong37@hotmail.com  
**Cc:** Maikel Peppelenbosch <m.peppelenbosch@erasmusmc.nl>; magreluc <magreluc@gmail.com>; Patrick Boor <p.boor@erasmusmc.nl>  
**Subject:** RE: Important! Please respond asap / acceptance manuscript BJC

Dear all,

I agree to the changes made in the manuscript BJC-A3339175R1.

Kind regards,

Jyaysi

---

**From:** Monique Verstegen <[m.verstegen@erasmusmc.nl](mailto:m.verstegen@erasmusmc.nl)>  
**Sent:** Tuesday, April 19, 2022 5:48 PM  
**To:** Guoying Zhou <[g.zhou@erasmusmc.nl](mailto:g.zhou@erasmusmc.nl)>; Ruby Lieshout <[r.lieshout@erasmusmc.nl](mailto:r.lieshout@erasmusmc.nl)>; Gilles van Tienderen <[g.vantienderen@erasmusmc.nl](mailto:g.vantienderen@erasmusmc.nl)>; [valeska@glycostem.com](mailto:valeska@glycostem.com); Martin van Royen <[m.vanroyen@erasmusmc.nl](mailto:m.vanroyen@erasmusmc.nl)>; Kübra Kötten <[k.kotten@erasmusmc.nl](mailto:k.kotten@erasmusmc.nl)>; [y.y.kan@amsterdamumc.nl](mailto:y.y.kan@amsterdamumc.nl); 'Cecile Geuijen <[C.Geuijen@merus.nl](mailto:C.Geuijen@merus.nl)> (C.Geuijen@merus.nl)' (C.Geuijen@merus.nl) <[C.Geuijen@merus.nl](mailto:C.Geuijen@merus.nl)>; Dave Sprengers <[d.sprengers@erasmusmc.nl](mailto:d.sprengers@erasmusmc.nl)>; Luc van der Laan <[l.vanderlaan@erasmusmc.nl](mailto:l.vanderlaan@erasmusmc.nl)>; Monique Verstegen <[m.verstegen@erasmusmc.nl](mailto:m.verstegen@erasmusmc.nl)>; [luciacampos3190@gmail.com](mailto:luciacampos3190@gmail.com); [gezhouhong37@hotmail.com](mailto:gezhouhong37@hotmail.com)  
**Cc:** Maikel Peppelenbosch <[m.peppelenbosch@erasmusmc.nl](mailto:m.peppelenbosch@erasmusmc.nl)>; magreluc <[magreluc@gmail.com](mailto:magreluc@gmail.com)>; Patrick Boor <[p.boor@erasmusmc.nl](mailto:p.boor@erasmusmc.nl)>; Jyaysi Desai <[j.desai@erasmusmc.nl](mailto:j.desai@erasmusmc.nl)>  
**Subject:** Important! Please respond asap / acceptance manuscript BJC  
**Importance:** High

Dear co-authors,

We are nearly there! Manuscript: BJC-A3339175R1 Modelling immune cytotoxicity for cholangiocarcinoma with tumor-derived organoids and effector T cells., gave us a small hiccup that is fortunately easily addressed.

As we needed to do more experiments in absence of Ruby and Estella, we asked Luc (M), Patrick and Jyaysi if they could help us. And they did! So, all were included as co-authors on this manuscript. The Journal now would like to formally ask all of you if you agree to those changes. For this I would need an e-mail from you, in which you confirm that you agree.

**Can you please send me your reply to this e-mail, including a statement that you agree to the changes made, i.e. including Luc Magre, Patrick P.C. Boor and Jyaysi Desai, in the author list at you soonest** so I can bundle all replies and upload them to BJC.

The BJC also wanted me to contact you to ask you to link your own ORCID to this manuscript. You can do this via the author portal here: <https://mts-bjcancer.nature.com/cgi-bin/main.plex> and click on the 'Modify My Springer Nature Account' (see below)

### General Tasks

[Modify My Springer Nature Account](#) *Click here to view your submitted manuscripts, article download*  
[Logout](#)

Hope to see your reply soon,

With kind regards,  
Monique Verstegen  
Corresponding author Manuscript: BJC-A3339175R1

### Dr. M.M.A (Monique) Verstegen Ph.D

Assistant professor

Surgery

+31 10 703 5528 |  
[m.verstegen@erasmusmc.nl](mailto:m.verstegen@erasmusmc.nl)  
[www.erasmusmc.nl](http://www.erasmusmc.nl)

Dr. Molewaterplein 40, 3015 GD Rotterdam  
P.O. Box 2040, 3000 CA Rotterdam

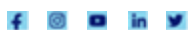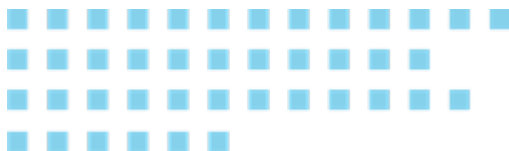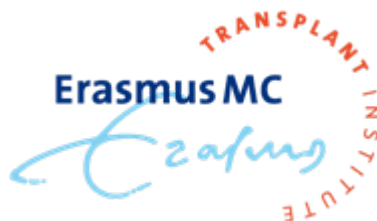

## Monique Verstegen

---

**From:** Luc van der Laan  
**Sent:** Tuesday, April 19, 2022 6:50 PM  
**To:** Monique Verstegen  
**Cc:** Maikel Peppelenbosch; magreluc; Patrick Boor; Jyaysi Desai  
**Subject:** RE: Important! Please respond asap / acceptance manuscript BJC

**Follow Up Flag:** Flag for follow up  
**Flag Status:** Flagged

Hi Monique,

I agree to the changes made, i.e. including Luc Magre, Patrick P.C. Boor and Jyaysi Desai, in the author list.

With kind regards  
Luc van der Laan

---

Luc JW van der Laan, PhD  
Professor in Liver Regenerative Medicine  
Head of Laboratory LETIS

---

Erasmus MC - University Medical Center  
Department of Surgery  
Dr. Molewaterplein 40, Room Na-1008  
3015 GD, Rotterdam  
The Netherlands  
Phone: +31 10 703 7557  
Email assist: [a.overgaauw@erasmusmc.nl](mailto:a.overgaauw@erasmusmc.nl)  
Website: [Laboratorium LETIS](http://Laboratorium LETIS)

---

Dyslexia Warning! Apologies in advance  
for poor spelling.

The information in this e-mail and any  
Attachment is strictly confidential and  
is intended solely for the individual or  
company to whom it is addressed.

---

**From:** Monique Verstegen <m.verstegen@erasmusmc.nl>  
**Sent:** dinsdag 19 april 2022 17:48  
**To:** Guoying Zhou <g.zhou@erasmusmc.nl>; Ruby Lieshout <r.lieshout@erasmusmc.nl>; Gilles van Tienderen <g.vantienderen@erasmusmc.nl>; valeska@glycostem.com; Martin van Royen <m.vanroyen@erasmusmc.nl>; Kübra Koten <k.koten@erasmusmc.nl>; y.y.kan@amsterdamumc.nl; 'Cecile Geuijen <C.Geuijen@merus.nl> (C.Geuijen@merus.nl)' (C.Geuijen@merus.nl) <C.Geuijen@merus.nl>; Dave Sprengers <d.sprengers@erasmusmc.nl>; Luc van der Laan <l.vanderlaan@erasmusmc.nl>; Monique Verstegen <m.verstegen@erasmusmc.nl>; luciacampos3190@gmail.com; gezhouhong37@hotmail.com  
**Cc:** Maikel Peppelenbosch <m.peppelenbosch@erasmusmc.nl>; magreluc <magreluc@gmail.com>; Patrick Boor <p.boor@erasmusmc.nl>; Jyaysi Desai <j.desai@erasmusmc.nl>  
**Subject:** Important! Please respond asap / acceptance manuscript BJC  
**Importance:** High

Dear co-authors,

We are nearly there! Manuscript: BJC-A3339175R1 Modelling immune cytotoxicity for cholangiocarcinoma with tumor-derived organoids and effector T cells., gave us a small hiccup that is fortunately easily addressed.

As we needed to do more experiments in absence of Ruby and Estella, we asked Luc (M), Patrick and Jyaysi if they could help us. And they did! So, all were included as co-authors on this manuscript. The Journal now would like to formally ask all of you if you agree to those changes. For this I would need an e-mail from you, in which you confirm that you agree.

**Can you please send me your reply to this e-mail, including a statement that you agree to the changes made, i.e. including Luc Magre, Patrick P.C. Boor and Jyaysi Desai, in the author list at you soonest** so I can bundle all replies and upload them to BJC.

The BJC also wanted me to contact you to ask you to link your own ORCID to this manuscript. You can do this via the author portal here: <https://mts-bjcancer.nature.com/cgi-bin/main.plex> and click on the 'Modify My Springer Nature Account' (see below)

### General Tasks

[Modify My Springer Nature Account](#) *Click here to view your submitted manuscripts, article download*  
[Logout](#)

Hope to see your reply soon,

With kind regards,  
Monique Verstegen  
Corresponding author Manuscript: BJC-A3339175R1

### Dr. M.M.A (Monique) Verstegen Ph.D

Assistant professor

Surgery

+31 10 703 5528 |  
[m.verstegen@erasmusmc.nl](mailto:m.verstegen@erasmusmc.nl)  
[www.erasmusmc.nl](http://www.erasmusmc.nl)

Dr. Molewaterplein 40, 3015 GD Rotterdam  
P.O. Box 2040, 3000 CA Rotterdam

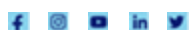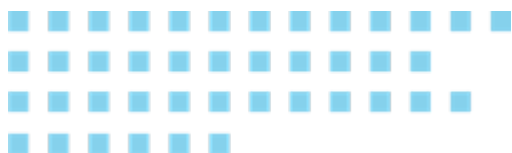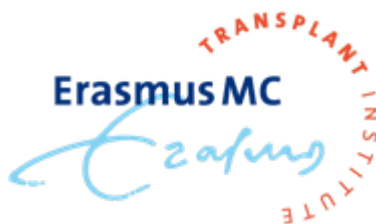



## Monique Verstegen

---

**From:** Lucia Campos <luciacampos3190@gmail.com>  
**Sent:** Wednesday, April 20, 2022 9:08 AM  
**To:** Monique Verstegen  
**Subject:** Re: Important! Please respond asap / acceptance manuscript BJC

**Follow Up Flag:** Follow up  
**Flag Status:** Completed

**Waarschuwing:** Deze e-mail is afkomstig van buiten de organisatie. Klik niet op links en open geen bijlagen, tenzij u de afzender herkent en weet dat de inhoud veilig is.  
**Caution:** This email originated from outside of the organization. Do not click links or open attachments unless you recognize the sender and know the content is safe.

Dear Monique,

I agree with adding Luc Magre, Patrick P.C. Boor and Jyaysi Desai as co-authors to the manuscript BJC-A3339175R1.

Let me know if there is anything else needed from my side.

Best,  
Lucia

--

**Lucia Campos Carrascosa, Ph.D.**

Brandstrasse 25  
8952 Schlieren, CH  
Tel. 0767251439

Am Di., 19. Apr. 2022 um 17:48 Uhr schrieb Monique Verstegen <[m.verstegen@erasmusmc.nl](mailto:m.verstegen@erasmusmc.nl)>:

Dear co-authors,

We are nearly there! Manuscript: BJC-A3339175R1 Modelling immune cytotoxicity for cholangiocarcinoma with tumor-derived organoids and effector T cells., gave us a small hick up that is fortunately easily addressed.

As we needed to do more experiments in absence of Ruby and Estella, we asked Luc (M), Patrick and Jyaysi if they could help us. And they did! So, all were included as co-authors on this manuscript. The Journal now would like to formally ask all of you if you agree to those changes. For this I would need an e-mail from you, in which you confirm that you agree.

**Can you please send me your reply to this e-mail, including a statement that you agree to the changes made, i.e. including Luc Magre, Patrick P.C. Boor and Jyaysi Desai, in the author list at you soonest** so I can bundle all replies and upload them to BJC.

The BJC also wanted me to contact you to ask you to link your own ORCID to this manuscript. You can do this via the author portal here: <https://mts-bjcancer.nature.com/cgi-bin/main.plex> and click on the 'Modify My Springer Nature Account' (see below)

### General Tasks

[Modify My Springer Nature Account](#) *Click here to view your submitted manuscripts, article download statist*  
[Logout](#)

Hope to see your reply soon,

With kind regards,

Monique Verstegen

Corresponding author Manuscript: BJC-A3339175R1

**Dr. M.M.A (Monique) Verstegen Ph.D**

Assistant professor

Surgery

+31 10 703 5528 |  
[m.verstegen@erasmusmc.nl](mailto:m.verstegen@erasmusmc.nl)  
[www.erasmusmc.nl](http://www.erasmusmc.nl)

Dr. Molewaterplein 40, 3015 GD Rotterdam  
P.O. Box 2040, 3000 CA Rotterdam

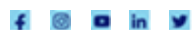

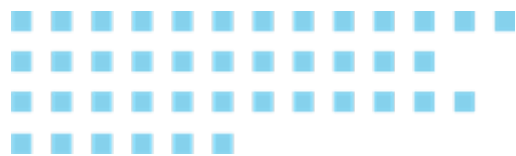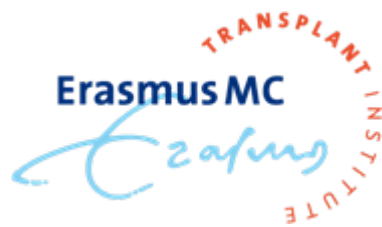

## Monique Verstegen

---

**From:** Maikel Peppelenbosch  
**Sent:** Thursday, April 21, 2022 9:00 AM  
**To:** Monique Verstegen  
**Subject:** RE: Important! Please respond asap / acceptance manuscript BJC

Dear Monique,

As the representative of Jaap Kwekkeboom I have the pleasure to inform you that you agree to the changes made, including Luc Magre, Patrick P.C. Boor and Jyaysi Desai, in the author list.

Met vriendelijke groet,

**prof. dr. Maikel P. Peppelenbosch**

Hoofd Laboratorium voor Maag-, Darm-, Leverziekten

Maag-, Darm-, Leverziekten

---

**Van:** Monique Verstegen <m.verstegen@erasmusmc.nl>

**Verzonden:** dinsdag 19 april 2022 17:48

**Aan:** Guoying Zhou <g.zhou@erasmusmc.nl>; Ruby Lieshout <r.lieshout@erasmusmc.nl>; Gilles van Tienderen <g.vantienderen@erasmusmc.nl>; valeska@glycostem.com; Martin van Royen <m.vanroyen@erasmusmc.nl>; Kübra Koten <k.koten@erasmusmc.nl>; y.y.kan@amsterdamumc.nl; 'Cecile Geuijen <C.Geuijen@merus.nl> (C.Geuijen@merus.nl)' (C.Geuijen@merus.nl) <C.Geuijen@merus.nl>; Dave Sprengers <d.sprengers@erasmusmc.nl>; Luc van der Laan <l.vanderlaan@erasmusmc.nl>; Monique Verstegen <m.verstegen@erasmusmc.nl>; luciacampos3190@gmail.com; gezhouhong37@hotmail.com

**CC:** Maikel Peppelenbosch <m.peppelenbosch@erasmusmc.nl>; magreluc <magreluc@gmail.com>; Patrick Boor <p.boor@erasmusmc.nl>; Jyaysi Desai <j.desai@erasmusmc.nl>

**Onderwerp:** Important! Please respond asap / acceptance manuscript BJC

**Urgentie:** Hoog

Dear co-authors,

We are nearly there! Manuscript: BJC-A3339175R1 Modelling immune cytotoxicity for cholangiocarcinoma with tumor-derived organoids and effector T cells., gave us a small hick up that is fortunately easily addressed.

As we needed to do more experiments in absence of Ruby and Estella, we asked Luc (M), Patrick and Jyaysi if they could help us. And they did! So, all were included as co-authors on this manuscript. The Journal now would like to formally ask all of you if you agree to those changes. For this I would need an e-mail from you, in which you confirm that you agree.

**Can you please send me your reply to this e-mail, including a statement that you agree to the changes made, i.e. including Luc Magre, Patrick P.C. Boor and Jyaysi Desai, in the author list at you soonest** so I can bundle all replies and upload them to BJC.

The BJC also wanted me to contact you to ask you to link your own ORCID to this manuscript. You can do this via the author portal here: <https://mts-bjcancer.nature.com/cgi-bin/main.plex> and click on the 'Modify My Springer Nature Account' (see below)

### General Tasks

[Modify My Springer Nature Account](#) *Click here to view your submitted manuscripts, article download*  
[Logout](#)

Hope to see your reply soon,

With kind regards,  
Monique Verstegen

Corresponding author Manuscript: BJC-A3339175R1

**Dr. M.M.A (Monique) Verstegen Ph.D**

Assistant professor

Surgery

+31 10 703 5528 |  
[m.verstegen@erasmusmc.nl](mailto:m.verstegen@erasmusmc.nl)  
[www.erasmusmc.nl](http://www.erasmusmc.nl)

Dr. Molewaterplein 40, 3015 GD Rotterdam  
P.O. Box 2040, 3000 CA Rotterdam

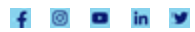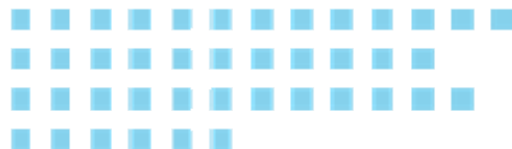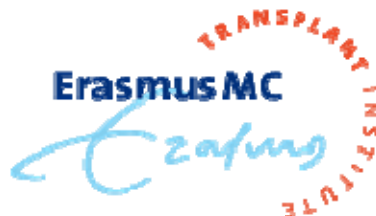

## Monique Verstegen

---

**From:** Martin van Royen  
**Sent:** Wednesday, April 20, 2022 10:07 PM  
**To:** Monique Verstegen; Guoying Zhou; Ruby Lieshout; Gilles van Tienderen; valeska@glycostem.com; Kübra Koten; y.y.kan@amsterdamumc.nl; 'Cecile Geuijen <C.Geuijen@merus.nl>' (C.Geuijen@merus.nl); Dave Sprengers; Luc van der Laan; luciacampos3190@gmail.com; gezhouhong37@hotmail.com  
**Cc:** Maikel Peppelenbosch; magreluc; Patrick Boor; Jyaysi Desai  
**Subject:** Re: Important! Please respond asap / acceptance manuscript BJC

**Follow Up Flag:** Flag for follow up  
**Flag Status:** Flagged

Dear Monique, I do agree with the changes made to the manuscript, including the addition of Luc Magre, Patrick P.C. Boor and Jyaysi Desai to the author list.

Best,  
Martin E. van Royen

---

**Martin E. van Royen, PhD**  
*Assistant professor*

Department of Pathology, Erasmus MC

Mail address; P.O. Box 2040, 3000 CA Rotterdam, The Netherlands  
Visiting address; Office: H Be 0346, Wytemaweg 80, 3015 CN Rotterdam, The Netherlands  
Tel: +31 10 7037644, Mobile: +31 6 12039870

E-mail: [m.vanroyen@erasmusmc.nl](mailto:m.vanroyen@erasmusmc.nl)

---

---

**Van:** Monique Verstegen <m.verstegen@erasmusmc.nl>

**Verzonden:** dinsdag 19 april 2022 17:48

**Aan:** Guoying Zhou <g.zhou@erasmusmc.nl>; Ruby Lieshout <r.lieshout@erasmusmc.nl>; Gilles van Tienderen <g.vantienderen@erasmusmc.nl>; valeska@glycostem.com <valeska@glycostem.com>; Martin van Royen <m.vanroyen@erasmusmc.nl>; Kübra Koten <k.koten@erasmusmc.nl>; y.y.kan@amsterdamumc.nl <y.y.kan@amsterdamumc.nl>; 'Cecile Geuijen <C.Geuijen@merus.nl>' (C.Geuijen@merus.nl) <C.Geuijen@merus.nl>; Dave Sprengers <d.sprengers@erasmusmc.nl>; Luc van der Laan <l.vanderlaan@erasmusmc.nl>; Monique Verstegen <m.verstegen@erasmusmc.nl>; luciacampos3190@gmail.com <luciacampos3190@gmail.com>; gezhouhong37@hotmail.com <gezhouhong37@hotmail.com>

**CC:** Maikel Peppelenbosch <m.peppelenbosch@erasmusmc.nl>; magreluc <magreluc@gmail.com>; Patrick Boor <p.boor@erasmusmc.nl>; Jyaysi Desai <j.desai@erasmusmc.nl>

**Onderwerp:** Important! Please respond asap / acceptance manuscript BJC

Dear co-authors,

We are nearly there! Manuscript: BJC-A3339175R1 Modelling immune cytotoxicity for cholangiocarcinoma with tumor-derived organoids and effector T cells., gave us a small hiccup that is fortunately easily addressed.

As we needed to do more experiments in absence of Ruby and Estella, we asked Luc (M), Patrick and Jyaysi if they could help us. And they did! So, all were included as co-authors on this manuscript. The Journal now would like to

formally ask all of you if you agree to those changes. For this I would need an e-mail from you, in which you confirm that you agree.

**Can you please send me your reply to this e-mail, including a statement that you agree to the changes made, i.e. including Luc Magre, Patrick P.C. Boor and Jyaysi Desai, in the author list at you soonest** so I can bundle all replies and upload them to BJC.

The BJC also wanted me to contact you to ask you to link your own ORCID to this manuscript. You can do this via the author portal here: <https://mts-bjcancer.nature.com/cgi-bin/main.plex> and click on the 'Modify My Springer Nature Account' (see below)

### General Tasks

[Modify My Springer Nature Account](#) *Click here to view your submitted manuscripts, article download*  
[Logout](#)

Hope to see your reply soon,

With kind regards,  
Monique Verstegen  
Corresponding author Manuscript: BJC-A3339175R1

### Dr. M.M.A (Monique) Verstegen Ph.D

Assistant professor

Surgery

+31 10 703 5528 |  
m.verstegen@erasmusmc.nl  
www.erasmusmc.nl

Dr. Molewaterplein 40, 3015 GD Rotterdam  
P.O. Box 2040, 3000 CA Rotterdam

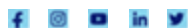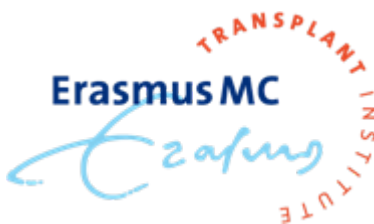

## Monique Verstegen

---

**From:** Patrick Boor  
**Sent:** Wednesday, April 20, 2022 10:14 AM  
**To:** Monique Verstegen  
**Subject:** RE: Important! Please respond asap / acceptance manuscript BJC

Hi Monique,

I confirm that I agree to the changes that are made to the paper

Regards,

Patrick Boor

---

**Van:** Monique Verstegen <m.verstegen@erasmusmc.nl>

**Verzonden:** dinsdag 19 april 2022 17:48

**Aan:** Guoying Zhou <g.zhou@erasmusmc.nl>; Ruby Lieshout <r.lieshout@erasmusmc.nl>; Gilles van Tienderen <g.vantienderen@erasmusmc.nl>; valeska@glycostem.com; Martin van Royen <m.vanroyen@erasmusmc.nl>; Kübra Koten <k.koten@erasmusmc.nl>; y.y.kan@amsterdamumc.nl; 'Cecile Geuijen <C.Geuijen@merus.nl> (C.Geuijen@merus.nl)' (C.Geuijen@merus.nl) <C.Geuijen@merus.nl>; Dave Sprengers <d.sprengers@erasmusmc.nl>; Luc van der Laan <l.vanderlaan@erasmusmc.nl>; Monique Verstegen <m.verstegen@erasmusmc.nl>; luciacampos3190@gmail.com; gezhouhong37@hotmail.com

**CC:** Maikel Peppelenbosch <m.peppelenbosch@erasmusmc.nl>; magreluc <magreluc@gmail.com>; Patrick Boor <p.boor@erasmusmc.nl>; Jyaysi Desai <j.desai@erasmusmc.nl>

**Onderwerp:** Important! Please respond asap / acceptance manuscript BJC

**Urgentie:** Hoog

Dear co-authors,

We are nearly there! Manuscript: BJC-A3339175R1 Modelling immune cytotoxicity for cholangiocarcinoma with tumor-derived organoids and effector T cells., gave us a small hick up that is fortunately easily addressed.

As we needed to do more experiments in absence of Ruby and Estella, we asked Luc (M), Patrick and Jyaysi if they could help us. And they did! So, all were included as co-authors on this manuscript. The Journal now would like to formally ask all of you if you agree to those changes. For this I would need an e-mail from you, in which you confirm that you agree.

**Can you please send me your reply to this e-mail, including a statement that you agree to the changes made, i.e. including Luc Magre, Patrick P.C. Boor and Jyaysi Desai, in the author list at you soonest** so I can bundle all replies and upload them to BJC.

The BJC also wanted me to contact you to ask you to link your own ORCID to this manuscript. You can do this via the author portal here: <https://mts-bjcancer.nature.com/cgi-bin/main.plex> and click on the 'Modify My Springer Nature Account' (see below)

### General Tasks

[Modify My Springer Nature Account](#) *Click here to view your submitted manuscripts, article download*  
[Logout](#)

Hope to see your reply soon,



With kind regards,  
Monique Verstegen  
Corresponding author Manuscript: BJC-A3339175R1

**Dr. M.M.A (Monique) Verstegen Ph.D**

Assistant professor

Surgery

+31 10 703 5528 |  
[m.verstegen@erasmusmc.nl](mailto:m.verstegen@erasmusmc.nl)  
[www.erasmusmc.nl](http://www.erasmusmc.nl)

Dr. Molewaterplein 40, 3015 GD Rotterdam  
P.O. Box 2040, 3000 CA Rotterdam

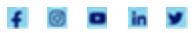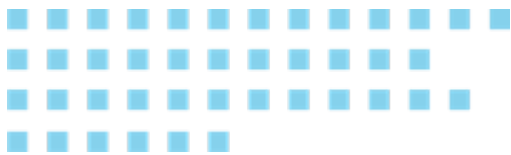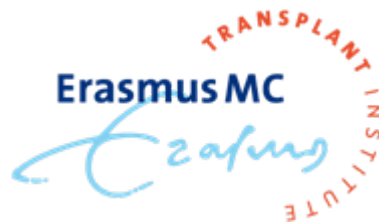

## Monique Verstegen

---

**From:** Ruby Lieshout  
**Sent:** Tuesday, April 19, 2022 6:00 PM  
**To:** Monique Verstegen  
**Subject:** RE: Important! Please respond asap / acceptance manuscript BJC

**Follow Up Flag:** Follow up  
**Flag Status:** Flagged

Dear Monique,

I agree to the addition of the new co-authors Luc Magre, Patrick P.C. Boor and Jyaysi Desai to the author list of this manuscript (BJC-A3339175R1).

Kind regards,

**R Lieshout**

PhD Student

Surgery  
Erasmus MC Transplant Institute

 [r.lieshout@erasmusmc.nl](mailto:r.lieshout@erasmusmc.nl)  
 [www.erasmusmc.nl](http://www.erasmusmc.nl)  
    

 Dr. Molewaterplein 40, 3015 GD Rotterdam  
P.O. Box 2040, 3000 CA Rotterdam

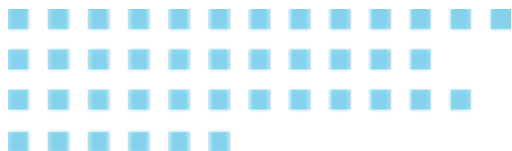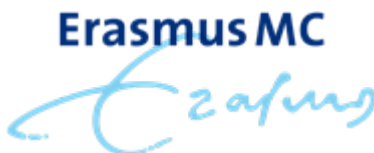

---

**From:** Monique Verstegen <m.verstegen@erasmusmc.nl>  
**Sent:** dinsdag 19 april 2022 17:48  
**To:** Guoying Zhou <g.zhou@erasmusmc.nl>; Ruby Lieshout <r.lieshout@erasmusmc.nl>; Gilles van Tienderen <g.vantienderen@erasmusmc.nl>; valeska@glycostem.com; Martin van Royen <m.vanroyen@erasmusmc.nl>; Kübra Koten <k.koten@erasmusmc.nl>; y.y.kan@amsterdamumc.nl; 'Cecile Geuijen <C.Geuijen@merus.nl> (C.Geuijen@merus.nl)' (C.Geuijen@merus.nl) <C.Geuijen@merus.nl>; Dave Sprengers <d.sprengers@erasmusmc.nl>; Luc van der Laan <l.vanderlaan@erasmusmc.nl>; Monique Verstegen <m.verstegen@erasmusmc.nl>; luciacampos3190@gmail.com; gezhouhong37@hotmail.com  
**Cc:** Maikel Peppelenbosch <m.peppelenbosch@erasmusmc.nl>; magreluc <magreluc@gmail.com>; Patrick Boor <p.boor@erasmusmc.nl>; Jyaysi Desai <j.desai@erasmusmc.nl>  
**Subject:** Important! Please respond asap / acceptance manuscript BJC  
**Importance:** High

Dear co-authors,

We are nearly there! Manuscript: BJC-A3339175R1 Modelling immune cytotoxicity for cholangiocarcinoma with tumor-derived organoids and effector T cells., gave us a small hick up that is fortunately easily addressed.

As we needed to do more experiments in absence of Ruby and Estella, we asked Luc (M), Patrick and Jyaysi if they could help us. And they did! So, all were included as co-authors on this manuscript. The Journal now would like to

formally ask all of you if you agree to those changes. For this I would need an e-mail from you, in which you confirm that you agree.

**Can you please send me your reply to this e-mail, including a statement that you agree to the changes made, i.e. including Luc Magre, Patrick P.C. Boor and Jyaysi Desai, in the author list at you soonest** so I can bundle all replies and upload them to BJC.

The BJC also wanted me to contact you to ask you to link your own ORCID to this manuscript. You can do this via the author portal here: <https://mts-bjcancer.nature.com/cgi-bin/main.plex> and click on the 'Modify My Springer Nature Account' (see below)

### General Tasks

[Modify My Springer Nature Account](#) *Click here to view your submitted manuscripts, article download*  
[Logout](#)

Hope to see your reply soon,

With kind regards,  
Monique Verstegen  
Corresponding author Manuscript: BJC-A3339175R1

### Dr. M.M.A (Monique) Verstegen Ph.D

Assistant professor

Surgery

+31 10 703 5528 |  
[m.verstegen@erasmusmc.nl](mailto:m.verstegen@erasmusmc.nl)  
[www.erasmusmc.nl](http://www.erasmusmc.nl)

Dr. Molewaterplein 40, 3015 GD Rotterdam  
P.O. Box 2040, 3000 CA Rotterdam

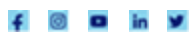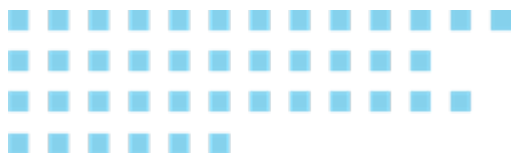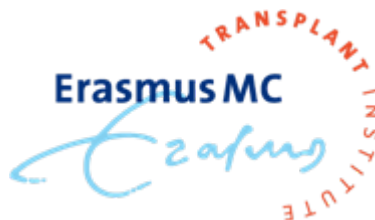

## Monique Verstegen

---

**From:** Valeska de Ruiter <valeska@glycostem.com>  
**Sent:** Thursday, April 21, 2022 4:32 PM  
**To:** Monique Verstegen  
**Subject:** RE: Important! Please respond asap / acceptance manuscript BJC

**Follow Up Flag:** Flag for follow up  
**Flag Status:** Flagged

**Waarschuwing:** Deze e-mail is afkomstig van buiten de organisatie. Klik niet op links en open geen bijlagen, tenzij u de afzender herkent en weet dat de inhoud veilig is.  
**Caution:** This email originated from outside of the organization. Do not click links or open attachments unless you recognize the sender and know the content is safe.

Dear Monique,

I agree to the changes made in the manuscript BJC-A3339175R1, i.e. including Luc Magre, Patrick P.C. Boor and Jyaysi Desai, in the author list.

Kind regards,  
Valeska de Ruiter

**Valeska de Ruiter**  
Development Technician

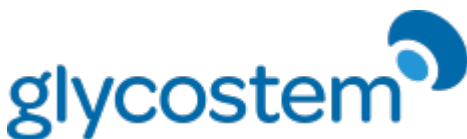

**T:** +31 880 025 909  
**F:** +31 412 712 900  
Kloosterstraat 9  
5349 AB Oss, The Netherlands  
**www.Glycostem.com**

*My working days are Monday to Friday*

This email and any files transmitted with it are confidential and intended solely for the use of the individual or entity to whom they are addressed. If you are not the intended recipient you are notified that disclosing, copying, distributing or taking any action in reliance on the contents of this information is strictly prohibited.

---

**From:** Monique Verstegen <m.verstegen@erasmusmc.nl>  
**Sent:** Tuesday, April 19, 2022 5:48 PM  
**To:** Guoying Zhou <g.zhou@erasmusmc.nl>; Ruby Lieshout <r.lieshout@erasmusmc.nl>; Gilles van Tienderen <g.vantienderen@erasmusmc.nl>; Valeska de Ruiter <valeska@glycostem.com>; Martin van Royen

<m.vanroyen@erasmusmc.nl>; Kübra Kotten <k.kotten@erasmusmc.nl>; y.y.kan@amsterdamumc.nl; 'Cecile Geuijen <C.Geuijen@merus.nl> (C.Geuijen@merus.nl)' (C.Geuijen@merus.nl) <C.Geuijen@merus.nl>; Dave Sprengers <d.sprengers@erasmusmc.nl>; Luc van der Laan <l.vanderlaan@erasmusmc.nl>; Monique Verstegen <m.verstegen@erasmusmc.nl>; luciacampos3190@gmail.com; gezhouhong37@hotmail.com  
**Cc:** Maikel Peppelenbosch <m.peppelenbosch@erasmusmc.nl>; magreluc <magreluc@gmail.com>; Patrick Boor <p.boor@erasmusmc.nl>; Jyaysi Desai <j.desai@erasmusmc.nl>

**Subject:** Important! Please respond asap / acceptance manuscript BJC

**Importance:** High

You don't often get email from [m.verstegen@erasmusmc.nl](mailto:m.verstegen@erasmusmc.nl). [Learn why this is important](#)

Dear co-authors,

We are nearly there! Manuscript: BJC-A3339175R1 Modelling immune cytotoxicity for cholangiocarcinoma with tumor-derived organoids and effector T cells., gave us a small hick up that is fortunately easily addressed.

As we needed to do more experiments in absence of Ruby and Estella, we asked Luc (M), Patrick and Jyaysi if they could help us. And they did! So, all were included as co-authors on this manuscript. The Journal now would like to formally ask all of you if you agree to those changes. For this I would need an e-mail from you, in which you confirm that you agree.

**Can you please send me your reply to this e-mail, including a statement that you agree to the changes made, i.e. including Luc Magre, Patrick P.C. Boor and Jyaysi Desai, in the author list at you soonest** so I can bundle all replies and upload them to BJC.

The BJC also wanted me to contact you to ask you to link your own ORCID to this manuscript. You can do this via the author portal here: <https://mts-bjcancer.nature.com/cgi-bin/main.plex> and click on the 'Modify My Springer Nature Account' (see below)

### General Tasks

[Modify My Springer Nature Account](#) *Click here to view your submitted manuscripts, article download sta*  
[Logout](#)

Hope to see your reply soon,

With kind regards,  
Monique Verstegen  
Corresponding author Manuscript: BJC-A3339175R1

### Dr. M.M.A (Monique) Verstegen Ph.D

Assistant professor

Surgery

+31 10 703 5528 |  
[m.verstegen@erasmusmc.nl](mailto:m.verstegen@erasmusmc.nl)  
[www.erasmusmc.nl](http://www.erasmusmc.nl)

Dr. Molewaterplein 40, 3015 GD Rotterdam  
P.O. Box 2040, 3000 CA Rotterdam

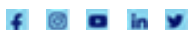

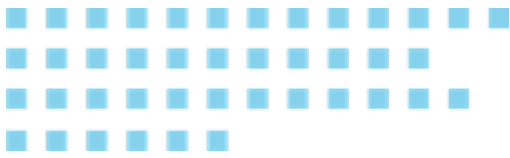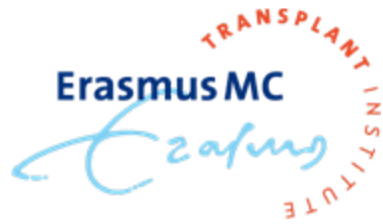

## Monique Verstegen

---

**From:** Kan, Y.Y. (Yik) <y.y.kan@amsterdamumc.nl>  
**Sent:** Tuesday, April 19, 2022 9:59 PM  
**To:** Monique Verstegen  
**Subject:** RE: Important! Please respond asap / acceptance manuscript BJC

**Follow Up Flag:** Flag for follow up  
**Flag Status:** Flagged

**Waarschuwing:** Deze e-mail is afkomstig van buiten de organisatie. Klik niet op links en open geen bijlagen, tenzij u de afzender herkent en weet dat de inhoud veilig is.  
**Caution:** This email originated from outside of the organization. Do not click links or open attachments unless you recognize the sender and know the content is safe.

Hi Monique,

Hierbij bevestig ik, dat ik hiermee akkoord ga.

Met vriendelijke groetjes,  
Yik

---

**Van:** Monique Verstegen <m.verstegen@erasmusmc.nl>

**Verzonden:** dinsdag 19 april 2022 17:48

**Aan:** Guoying Zhou <g.zhou@erasmusmc.nl>; Ruby Lieshout <r.lieshout@erasmusmc.nl>; Gilles van Tienderen <g.vantienderen@erasmusmc.nl>; valeska@glycostem.com; Martin van Royen <m.vanroyen@erasmusmc.nl>; Kübra Koten <k.koten@erasmusmc.nl>; Kan, Y.Y. (Yik) <y.y.kan@amsterdamumc.nl>; 'Cecile Geuijen <C.Geuijen@merus.nl> (C.Geuijen@merus.nl)' (C.Geuijen@merus.nl) <C.Geuijen@merus.nl>; Dave Sprengers <d.sprengers@erasmusmc.nl>; Luc van der Laan <l.vanderlaan@erasmusmc.nl>; Monique Verstegen <m.verstegen@erasmusmc.nl>; luciacampos3190@gmail.com; gezhouhong37@hotmail.com

**CC:** Maikel Peppelenbosch <m.peppelenbosch@erasmusmc.nl>; magreluc <magreluc@gmail.com>; Patrick Boor <p.boor@erasmusmc.nl>; Jyaysi Desai <j.desai@erasmusmc.nl>

**Onderwerp:** Important! Please respond asap / acceptance manuscript BJC

**Urgentie:** Hoog

Dear co-authors,

We are nearly there! Manuscript: BJC-A3339175R1 Modelling immune cytotoxicity for cholangiocarcinoma with tumor-derived organoids and effector T cells., gave us a small hick up that is fortunately easily addressed.

As we needed to do more experiments in absence of Ruby and Estella, we asked Luc (M), Patrick and Jyaysi if they could help us. And they did! So, all were included as co-authors on this manuscript. The Journal now would like to formally ask all of you if you agree to those changes. For this I would need an e-mail from you, in which you confirm that you agree.

**Can you please send me your reply to this e-mail, including a statement that you agree to the changes made, i.e. including Luc Magre, Patrick P.C. Boor and Jyaysi Desai, in the author list at you soonest** so I can bundle all replies and upload them to BJC.

The BJC also wanted me to contact you to ask you to link your own ORCID to this manuscript. You can do this via the author portal here: <https://mts-bjcancer.nature.com/cgi-bin/main.plex> and click on the 'Modify My Springer Nature Account' (see below)

## General Tasks

[Modify My Springer Nature Account](#) *Click here to view your submitted manuscripts, article download*  
[Logout](#)

Hope to see your reply soon,

With kind regards,  
Monique Verstegen  
Corresponding author Manuscript: BJC-A3339175R1

### Dr. M.M.A (Monique) Verstegen Ph.D

Assistant professor

Surgery

+31 10 703 5528 |  
[m.verstegen@erasmusmc.nl](mailto:m.verstegen@erasmusmc.nl)  
[www.erasmusmc.nl](http://www.erasmusmc.nl)

Dr. Molewaterplein 40, 3015 GD Rotterdam  
P.O. Box 2040, 3000 CA Rotterdam

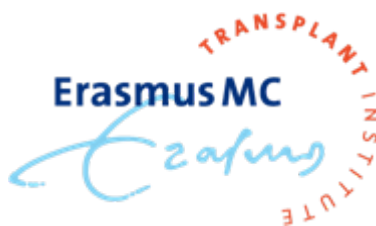

---

VUmc disclaimer : [www.vumc.nl/disclaimer](http://www.vumc.nl/disclaimer)  
AMC disclaimer : [www.amc.nl/disclaimer](http://www.amc.nl/disclaimer)



## Monique Verstegen

---

**From:** Zhouhong Ge <gezhouhong37@hotmail.com>  
**Sent:** Wednesday, April 20, 2022 12:18 PM  
**To:** Monique Verstegen  
**Subject:** RE: Important! Please respond asap / acceptance manuscript BJC

**Waarschuwing:** Deze e-mail is afkomstig van buiten de organisatie. Klik niet op links en open geen bijlagen, tenzij u de afzender herkent en weet dat de inhoud veilig is.

**Caution:** This email originated from outside of the organization. Do not click links or open attachments unless you recognize the sender and know the content is safe.

Dear Monique,

I agree to the changes made in the manuscript BJC-A3339175R1.

Best regards,  
Zhouhong

---

**From:** [Kübra Koten](#)  
**Sent:** Wednesday, April 20, 2022 10:45 AM  
**To:** [Jyaysi Desai](#); [Monique Verstegen](#); [Guoying Zhou](#); [Ruby Lieshout](#); [Gilles van Tienderen](#); [valeska@glycostem.com](mailto:valeska@glycostem.com); [Martin van Royen](mailto:Martin.van.Royen); [y.y.kan@amsterdamumc.nl](mailto:y.y.kan@amsterdamumc.nl); 'Cecile Geuijen <[C.Geuijen@merus.nl](mailto:C.Geuijen@merus.nl)> ([C.Geuijen@merus.nl](mailto:C.Geuijen@merus.nl))' ([C.Geuijen@merus.nl](mailto:C.Geuijen@merus.nl)); [Dave Sprengers](#); [Luc van der Laan](#); [luciacampos3190@gmail.com](mailto:luciacampos3190@gmail.com); [gezhouhong37@hotmail.com](mailto:gezhouhong37@hotmail.com)  
**Cc:** [Maikel Peppelenbosch](#); [magreluc](#); [Patrick Boor](#)  
**Subject:** RE: Important! Please respond asap / acceptance manuscript BJC

Dear all,

I agree to the changes made in the manuscript BJC-A3339175R1.

Kind regards,

Kübra Kötten

---

**From:** Jyaysi Desai <[j.desai@erasmusmc.nl](mailto:j.desai@erasmusmc.nl)>  
**Sent:** Wednesday, April 20, 2022 10:22  
**To:** Monique Verstegen <[m.verstegen@erasmusmc.nl](mailto:m.verstegen@erasmusmc.nl)>; Guoying Zhou <[g.zhou@erasmusmc.nl](mailto:g.zhou@erasmusmc.nl)>; Ruby Lieshout <[r.lieshout@erasmusmc.nl](mailto:r.lieshout@erasmusmc.nl)>; Gilles van Tienderen <[g.vantienderen@erasmusmc.nl](mailto:g.vantienderen@erasmusmc.nl)>; [valeska@glycostem.com](mailto:valeska@glycostem.com); Martin van Royen <[m.vanroyen@erasmusmc.nl](mailto:m.vanroyen@erasmusmc.nl)>; Kübra Koten <[k.koten@erasmusmc.nl](mailto:k.koten@erasmusmc.nl)>; [y.y.kan@amsterdamumc.nl](mailto:y.y.kan@amsterdamumc.nl); 'Cecile Geuijen <[C.Geuijen@merus.nl](mailto:C.Geuijen@merus.nl)> ([C.Geuijen@merus.nl](mailto:C.Geuijen@merus.nl))' ([C.Geuijen@merus.nl](mailto:C.Geuijen@merus.nl)) <[C.Geuijen@merus.nl](mailto:C.Geuijen@merus.nl)>; [Dave Sprengers](mailto:d.sprengers@erasmusmc.nl); [Luc van der Laan](mailto:luciacampos3190@gmail.com) <[l.vanderlaan@erasmusmc.nl](mailto:l.vanderlaan@erasmusmc.nl)>; [luciacampos3190@gmail.com](mailto:luciacampos3190@gmail.com); [gezhouhong37@hotmail.com](mailto:gezhouhong37@hotmail.com)  
**Cc:** [Maikel Peppelenbosch](mailto:m.peppelenbosch@erasmusmc.nl); [magreluc](mailto:magreluc@gmail.com); [Patrick Boor](mailto:p.boor@erasmusmc.nl)  
**Subject:** RE: Important! Please respond asap / acceptance manuscript BJC

Dear all,

I agree to the changes made in the manuscript BJC-A3339175R1.

Kind regards,  
Jyaysi

---

**From:** Monique Verstegen <[m.verstegen@erasmusmc.nl](mailto:m.verstegen@erasmusmc.nl)>  
**Sent:** Tuesday, April 19, 2022 5:48 PM  
**To:** Guoying Zhou <[g.zhou@erasmusmc.nl](mailto:g.zhou@erasmusmc.nl)>; Ruby Lieshout <[r.lieshout@erasmusmc.nl](mailto:r.lieshout@erasmusmc.nl)>; Gilles van Tienderen <[g.vantienderen@erasmusmc.nl](mailto:g.vantienderen@erasmusmc.nl)>; [valeska@glycostem.com](mailto:valeska@glycostem.com); Martin van Royen <[m.vanroyen@erasmusmc.nl](mailto:m.vanroyen@erasmusmc.nl)>; Kübra Koten <[k.koten@erasmusmc.nl](mailto:k.koten@erasmusmc.nl)>; [y.y.kan@amsterdamumc.nl](mailto:y.y.kan@amsterdamumc.nl); 'Cecile Geuijen <[C.Geuijen@merus.nl](mailto:C.Geuijen@merus.nl)> (<[C.Geuijen@merus.nl](mailto:C.Geuijen@merus.nl)> (<[C.Geuijen@merus.nl](mailto:C.Geuijen@merus.nl)>); Dave Sprengers <[d.sprengers@erasmusmc.nl](mailto:d.sprengers@erasmusmc.nl)>; Luc van der Laan <[l.vanderlaan@erasmusmc.nl](mailto:l.vanderlaan@erasmusmc.nl)>; Monique Verstegen <[m.verstegen@erasmusmc.nl](mailto:m.verstegen@erasmusmc.nl)>; [luciacampos3190@gmail.com](mailto:luciacampos3190@gmail.com); [gezhouhong37@hotmail.com](mailto:gezhouhong37@hotmail.com)  
**Cc:** Maikel Peppelenbosch <[m.peppelenbosch@erasmusmc.nl](mailto:m.peppelenbosch@erasmusmc.nl)>; magreluc <[magreluc@gmail.com](mailto:magreluc@gmail.com)>; Patrick Boor <[p.boor@erasmusmc.nl](mailto:p.boor@erasmusmc.nl)>; Jyaysi Desai <[j.desai@erasmusmc.nl](mailto:j.desai@erasmusmc.nl)>  
**Subject:** Important! Please respond asap / acceptance manuscript BJC  
**Importance:** High

Dear co-authors,

We are nearly there! Manuscript: BJC-A3339175R1 Modelling immune cytotoxicity for cholangiocarcinoma with tumor-derived organoids and effector T cells., gave us a small hiccup that is fortunately easily addressed.

As we needed to do more experiments in absence of Ruby and Estella, we asked Luc (M), Patrick and Jyaysi if they could help us. And they did! So, all were included as co-authors on this manuscript. The Journal now would like to formally ask all of you if you agree to those changes. For this I would need an e-mail from you, in which you confirm that you agree.

**Can you please send me your reply to this e-mail, including a statement that you agree to the changes made, i.e. including Luc Magre, Patrick P.C. Boor and Jyaysi Desai, in the author list at you soonest** so I can bundle all replies and upload them to BJC.

The BJC also wanted me to contact you to ask you to link your own ORCID to this manuscript. You can do this via the author portal here: <https://mts-bjcancer.nature.com/cgi-bin/main.plex> and click on the 'Modify My Springer Nature Account' (see below)

### General Tasks

[Modify My Springer Nature Account](#) *Click here to view your submitted manuscripts, article download*  
[Logout](#)

Hope to see your reply soon,

With kind regards,  
Monique Verstegen  
Corresponding author Manuscript: BJC-A3339175R1

### Dr. M.M.A (Monique) Verstegen Ph.D

Assistant professor

Surgery

+31 10 703 5528 |

[m.verstegen@erasmusmc.nl](mailto:m.verstegen@erasmusmc.nl)

[www.erasmusmc.nl](http://www.erasmusmc.nl)

Dr. Molewaterplein 40, 3015 GD Rotterdam

P.O. Box 2040, 3000 CA Rotterdam

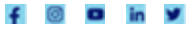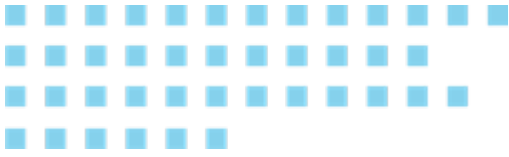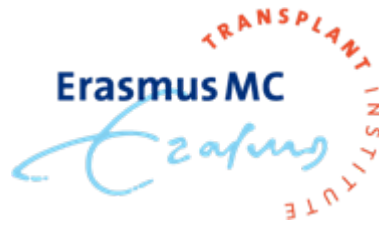

Supplement: 41416_2022_1839_MOESM6_ESM.pdf [file 41416_2022_1839_MOESM6_ESM.pdf]
